# Supplementary material
Source: Springer Nature journal article supplement (https://www.springermedizin.de/resource/supplementary/12985_2010_867_MOESM4_ESM.pdf/9608626)
Supplement: MOESM4 [file 9608626]

| Majority | TTATACCTCCACGCGCTTGCCCGATCTCAAGCTATCACTAGTAGTCTCTGTTTCACGAAATTCGACTGTCTATCTTTCTATCACCAATCGTTAATAATTAATCAAAACTTAGGATCCAGGACGCAGCAAGCCAACAGGCCAACCAAGTCC |                   |                                                                                                  |                                                             |     |     |     |     |     |     |     |     |     |     |     |     |  |  |  |
|----------|--------------------------------------------------------------------------------------------------------------------------------------------------------|-------------------|--------------------------------------------------------------------------------------------------|-------------------------------------------------------------|-----|-----|-----|-----|-----|-----|-----|-----|-----|-----|-----|-----|--|--|--|
|          | 310                                                                                                                                                    | 320               | 330                                                                                              | 340                                                         | 350 | 360 | 370 | 380 | 390 | 400 | 410 | 420 | 430 | 440 | 450 |     |  |  |  |
| Tw1      | .....T.....T.....                                                                                                                                      |                   |                                                                                                  |                                                             |     |     |     |     |     |     |     |     |     |     |     | 450 |  |  |  |
| Tw2      | .....I.....T.....T.....                                                                                                                                |                   |                                                                                                  |                                                             |     |     |     |     |     |     |     |     |     |     |     | 450 |  |  |  |
| Tw3      | .....T.....T.....                                                                                                                                      |                   |                                                                                                  |                                                             |     |     |     |     |     |     |     |     |     |     |     | 450 |  |  |  |
| Tw4      | CC                                                                                                                                                     | .....C.....       |                                                                                                  |                                                             |     |     |     |     |     |     |     |     |     |     |     | 450 |  |  |  |
| Tw5      | .....T.....G.....T.....A                                                                                                                               |                   |                                                                                                  |                                                             |     |     |     |     |     |     |     |     |     |     |     | 450 |  |  |  |
| Tw6      | CC                                                                                                                                                     | .....C.....C..... |                                                                                                  |                                                             |     |     |     |     |     |     |     |     |     |     |     | 450 |  |  |  |
| Tw7      | CC                                                                                                                                                     | .....C.....       |                                                                                                  |                                                             |     |     |     |     |     |     |     |     |     |     |     | 450 |  |  |  |
| Vacc-N   | TC                                                                                                                                                     | A                 | T                                                                                                | .....G.C.A.....A.CG.....AGC.A.....G.....AT.....T.....G..... |     |     |     |     |     |     |     |     |     |     |     | 450 |  |  |  |
| Vacc-P   | .....A.....A.....G.....I.....                                                                                                                          |                   |                                                                                                  |                                                             |     |     |     |     |     |     |     |     |     |     |     | 450 |  |  |  |
| Vacc-Q   | TC                                                                                                                                                     | A                 | T                                                                                                | .....G.C.A.....C.....AGC.A.....G.....AT.....T.....G.....    |     |     |     |     |     |     |     |     |     |     |     | 450 |  |  |  |
| Majority | ACCAATCCGAGGCCGGGCAGGAACCCCCACAACAGACAAGCCCCATGCACAACAAAATTCGCAAAAAATCCAAACCTTGCACACACCCGACAAGATCCCCTCCAACAACACAGCACCAGATCCGCCGAGACCAAGACCTCCCAAGGA    |                   |                                                                                                  |                                                             |     |     |     |     |     |     |     |     |     |     |     |     |  |  |  |
|          | 460                                                                                                                                                    | 470               | 480                                                                                              | 490                                                         | 500 | 510 | 520 | 530 | 540 | 550 | 560 | 570 | 580 | 590 | 600 |     |  |  |  |
| Tw1      | .....G.....G.....                                                                                                                                      |                   |                                                                                                  |                                                             |     |     |     |     |     |     |     |     |     |     |     | 600 |  |  |  |
| Tw2      | .....C.....                                                                                                                                            |                   |                                                                                                  |                                                             |     |     |     |     |     |     |     |     |     |     |     | 600 |  |  |  |
| Tw3      | .....G.....                                                                                                                                            |                   |                                                                                                  |                                                             |     |     |     |     |     |     |     |     |     |     |     | 600 |  |  |  |
| Tw4      | .....T.....                                                                                                                                            |                   |                                                                                                  |                                                             |     |     |     |     |     |     |     |     |     |     |     | 600 |  |  |  |
| Tw5      | .....G.....T.....A.A.....                                                                                                                              |                   |                                                                                                  |                                                             |     |     |     |     |     |     |     |     |     |     |     | 600 |  |  |  |
| Tw6      | .....T.....                                                                                                                                            |                   |                                                                                                  |                                                             |     |     |     |     |     |     |     |     |     |     |     | 600 |  |  |  |
| Tw7      | .....T.....                                                                                                                                            |                   |                                                                                                  |                                                             |     |     |     |     |     |     |     |     |     |     |     | 600 |  |  |  |
| Vacc-N   | GC.A.G                                                                                                                                                 | A                 | .....C.G.....GGG.C.....GC.....AAA.T.....A.....C.G.C.C.....C.....GA.C.AA.....G.....G.C.....       |                                                             |     |     |     |     |     |     |     |     |     |     | 600 |     |  |  |  |
| Vacc-P   | G.A.                                                                                                                                                   | G                 | .....T.....C.....G.....A.AAA.....A.....C.T.C.C.....A.....G.....G.C.....                          |                                                             |     |     |     |     |     |     |     |     |     |     | 600 |     |  |  |  |
| Vacc-Q   | GC.A.G                                                                                                                                                 | A                 | .....C.G.....GGG.C.....GC.....A.AAA.....T.....A.....C.G.C.C.....C.....GA.C.AA.....G.....G.C..... |                                                             |     |     |     |     |     |     |     |     |     |     | 600 |     |  |  |  |
| Majority | CGACACAGCATAACATCGGCTCAGAGATCCACGCACCATGGTCCCTCGAACATCGGACAGGTCGGTCCACTACATAATGAACAGGACCAAGTCTTGCAAGCAAATAGCCACAGATCGGATAACATCCCGCCTCAGAGACCACGAGGGT   |                   |                                                                                                  |                                                             |     |     |     |     |     |     |     |     |     |     |     |     |  |  |  |
|          | 610                                                                                                                                                    | 620               | 630                                                                                              | 640                                                         | 650 | 660 | 670 | 680 | 690 | 700 | 710 | 720 | 730 | 740 | 750 |     |  |  |  |
| Tw1      | ..T.T.....T.....                                                                                                                                       |                   |                                                                                                  |                                                             |     |     |     |     |     |     |     |     |     |     |     | 750 |  |  |  |
| Tw2      | ..T.T.....A.T.....                                                                                                                                     |                   |                                                                                                  |                                                             |     |     |     |     |     |     |     |     |     |     |     | 750 |  |  |  |
| Tw3      | ..T.T.....T.....                                                                                                                                       |                   |                                                                                                  |                                                             |     |     |     |     |     |     |     |     |     |     |     | 750 |  |  |  |
| Tw4      | ..C.....C.....C.....                                                                                                                                   |                   |                                                                                                  |                                                             |     |     |     |     |     |     |     |     |     |     |     | 750 |  |  |  |
| Tw5      | ..T.T.....T.....C.....A.....                                                                                                                           |                   |                                                                                                  |                                                             |     |     |     |     |     |     |     |     |     |     |     | 750 |  |  |  |
| Tw6      | ..C.....C.....C.....                                                                                                                                   |                   |                                                                                                  |                                                             |     |     |     |     |     |     |     |     |     |     |     | 750 |  |  |  |
| Tw7      | ..C.....C.....C.....                                                                                                                                   |                   |                                                                                                  |                                                             |     |     |     |     |     |     |     |     |     |     |     | 750 |  |  |  |
| Vacc-N   | .....A.....C.....TC.A.....G.AC.....TC.....CC.....T.....CC.....T.A.G.....GT.....G.A.....C.....                                                          |                   |                                                                                                  |                                                             |     |     |     |     |     |     |     |     |     |     |     | 750 |  |  |  |
| Vacc-P   | .....C.....C.....A.....C.....G.....G.C.T.....G.....G.....G.....                                                                                        |                   |                                                                                                  |                                                             |     |     |     |     |     |     |     |     |     |     |     | 750 |  |  |  |
| Vacc-Q   | .....A.....C.....T.A.....AC.....TC.....CC.....T.....CC.....T.A.G.....AGT.....G.A.....C.....                                                            |                   |                                                                                                  |                                                             |     |     |     |     |     |     |     |     |     |     |     | 750 |  |  |  |

Phylogenetic tree and sequence alignment of the Fsp gene. The tree shows relationships between various isolates, with a scale bar indicating 10, 30, and 40 substitutions per site. The alignment shows the ATG start codon and the TGC stop codon for most isolates, with some variations in the stop codon (AAA, GAA, CAA, ACA).

| Isolate       | Sequence         |
|---------------|------------------|
| TW1           | ATG.....TGC..... |
| TW2           | ATG.....CGC..... |
| TW-KS2        | ATG.....TGC..... |
| TW-TP1        | ATG.....TGC..... |
| TW-KL1        | ATG.....TGC..... |
| HeB-07        | ATG.....TGC..... |
| JL-07         | ATG.....TGC..... |
| NM            | ATG.....TGC..... |
| ZD01          | ATG.....TGC..... |
| BS0610        | ATG.....TGC..... |
| Asia-2 007Lm  | ATG.....AAA..... |
| 5047/91       | ATG.....AAA..... |
| R252/72       | ATG.....AAA..... |
| Rockborn      | ATG.....AAA..... |
| X65509        | ATG.....AAA..... |
| A75/17        | ATG.....GAA..... |
| 01-2689       | ATG.....GAA..... |
| 5804          | ATG.....CAA..... |
| 5804P         | ATG.....CAA..... |
| 00-2601       | ATG.....GAA..... |
| Vacc-P        | ATG.....AAA..... |
| Vaccine X     | ATG.....AAA..... |
| Vacc-Q        | ATG.....AAA..... |
| Onderstepoort | ATG.....AAA..... |
| Snyder Hill   | ATG.....ACA..... |
